# Supplementary material for: Carbon ions induce autophagy effectively through stimulating the unfolded protein response and subsequent inhibiting Akt phosphorylation in tumor cells
Source: PubMed Central journal article supplement (PMC4559768; doi:10.1038/srep13815), 2015-09-04
Supplement: srep13815-s1.pdf [file srep13815-s1.pdf]

# Supplementary Information

## **Carbon ions induce autophagy effectively through stimulating the unfolded protein response and subsequent inhibiting Akt phosphorylation in tumor cells**

Xiaodong Jin<sup>1,2</sup>, Feifei Li<sup>1,2,3</sup>, Xiaogang Zheng<sup>1,2,3</sup>, Yan Liu<sup>1,2,3</sup>, Ryoichi Hirayama<sup>4</sup>

Xiongxiong Liu<sup>1,2</sup>, Ping Li<sup>1,2</sup>, Ting Zhao<sup>1,2</sup>, Zhongying Dai<sup>1,2</sup>, Qiang Li<sup>1,2,\*</sup>

<sup>1</sup> Institute of Modern Physics, Chinese Academy of Sciences, Lanzhou 730000, China

<sup>2</sup> Key Laboratory of Heavy Ion Radiation Biology and Medicine of Chinese Academy of Sciences, Lanzhou 730000, China

<sup>3</sup> University of Chinese Academy of Sciences, Beijing 100049, China

<sup>4</sup> Research Center for Charged Particle Therapy, National Institute of Radiological Sciences, Anagawa 4-9-1, Inage-ku, Chiba 263-8555, Japan

\*Corresponding author

Qiang Li, Phone: 86-931-4969316 Fax: +86-931-8272100 E-mail: liqiang@impcas.ac.cn

**Supplementary Information:** 2 pages, 1 table, 1 figure

**Table S1 The parameters of survival curves of SHG44 cells treated differently**

| Treatment                               | $\alpha$ (Gy <sup>-1</sup> ) | $\beta$ (Gy <sup>-2</sup> ) |
|-----------------------------------------|------------------------------|-----------------------------|
| X-rays                                  | 0.37                         | 0.04                        |
| 30 keV/ $\mu$ m carbon ions             | 0.61                         | -                           |
| 75 keV/ $\mu$ m carbon ions             | 0.99                         | -                           |
| 75 keV/ $\mu$ m carbon ions + CQ        | 1.24                         | -                           |
| 75 keV/ $\mu$ m carbon ions + rapamycin | 0.88                         | -                           |

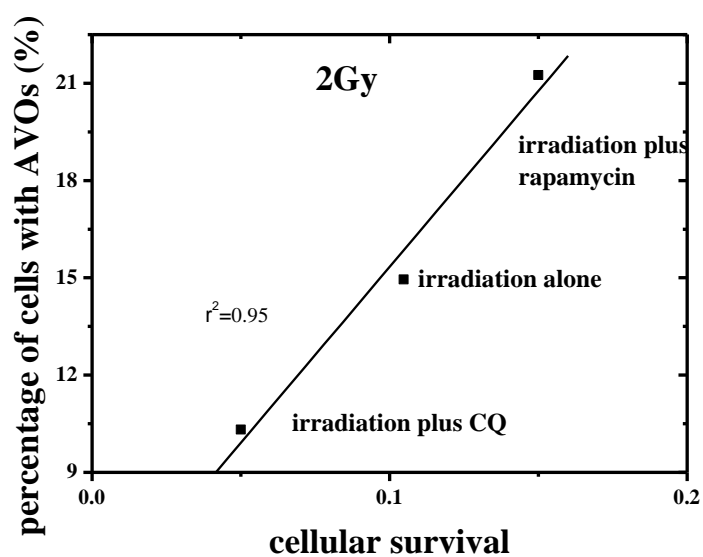

**Figure S1 Percentage of SHG44 cells with AVOs 24 h after treatment with 2 Gy of radiation (75 keV/ $\mu$ m carbon ions), radiation plus CQ or radiation plus rapamycin as a function of the survival fraction. The data were fitted using the least-squares method.**
